# Supplementary material for: Semantic segmentation of synchrotron tomography of multiphase Al-Si alloys using a convolutional neural network with a pixel-wise weighted loss function
Source: PubMed Central journal article supplement (PMC6928157; doi:10.1038/s41598-019-56008-7), 2019-12-23
Supplement: 41598_2019_56008_MOESM1_ESM.pdf [file 41598_2019_56008_MOESM1_ESM.pdf]

# Semantic segmentation of synchrotron tomography of multiphase Al-Si alloys using a convolutional neural network with a pixel-wise weighted loss function

Tobias STROHMANN\*<sup>1</sup>, Katrin BUGELNIG<sup>1</sup>, Eric BREITBARTH<sup>1</sup>, Fabian WILDE<sup>2</sup>,  
Thomas STEFFENS<sup>3</sup>, Holger GERMANN<sup>3</sup>,  
Guillermo REQUENA<sup>1,4</sup>

## Supplementary figures

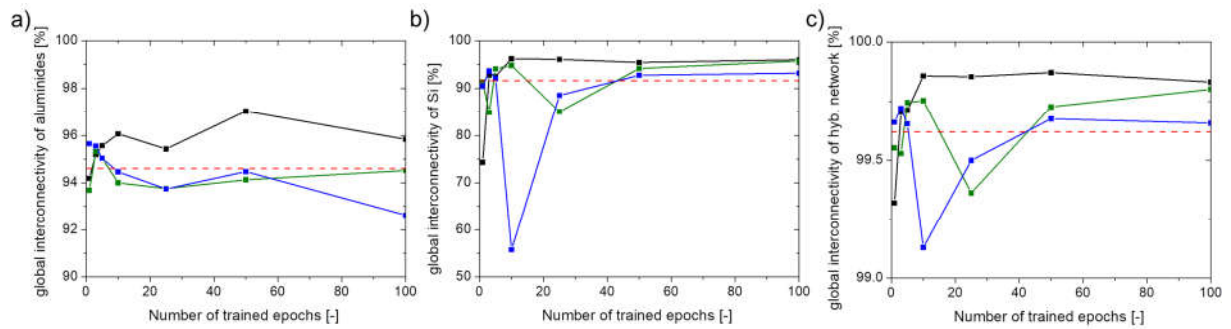

Supplementary figure 1 - Global interconnectivity of Si, aluminides and the hybrid Si+aluminides networks
